# Supplementary material
Source: MDPI journal article supplement (https://www.mdpi.com/2072-4292/12/17/2701)
Supplement: s1 [file s1]

# Urbanization-Driven Changes in Land-Climate Dynamics: A Case Study of Haihe River Basin, China

## Supplementary Materials

**Table S1.** The databases of the key land-climate indicators.

| Indicator | Database                                   | Provider                                                                                                                | Original cadence | Spatial resolution |
|-----------|--------------------------------------------|-------------------------------------------------------------------------------------------------------------------------|------------------|--------------------|
| NDVI      | MOD13Q1.006 Terra                          | NASA LP DAAC at the USGS EROS Center                                                                                    | 16-day           | 250 m              |
| albedo    | MCD43A1.005 BRDF                           | NASA LP DAAC at the USGS EROS Center                                                                                    | 16-day           | 500 m              |
| LST       | MODLT1M                                    | International Scientific & Technical Data Mirror Site, Computer Network Information Center, Chinese Academy of Sciences | 1-month          | 1000 m             |
| CWC       | MOD08 V6 Atmosphere Monthly Global Product | NASA GSFC                                                                                                               | 1-month          | 1 arc degrees      |
| P         | Global Land Data Assimilation System       | NASA                                                                                                                    | 3-hour           | 0.25 arc degrees   |

**Table S2.** The area proportion dynamics of the land use and cover change from 2000 to 2015 in the Haihe River Basin and the trends regression.

| Year                      | Agricultural land | Forest     | Grassland and shrub | Waters and wetland | Bare land  | Urban      |
|---------------------------|-------------------|------------|---------------------|--------------------|------------|------------|
| 2000                      | 53.05%            | 10.02%     | 33.25%              | 1.47%              | 0.01%      | 2.20%      |
| 2001                      | 52.90%            | 10.20%     | 32.92%              | 1.47%              | 0.01%      | 2.50%      |
| 2002                      | 52.77%            | 10.21%     | 32.79%              | 1.46%              | 0.01%      | 2.76%      |
| 2003                      | 52.57%            | 10.30%     | 32.61%              | 1.46%              | 0.01%      | 3.05%      |
| 2004                      | 52.12%            | 10.45%     | 32.39%              | 1.46%              | 0.01%      | 3.57%      |
| 2005                      | 51.91%            | 10.45%     | 32.34%              | 1.46%              | 0.01%      | 3.83%      |
| 2006                      | 51.63%            | 10.44%     | 32.26%              | 1.45%              | 0.01%      | 4.21%      |
| 2007                      | 51.37%            | 10.46%     | 32.19%              | 1.43%              | 0.01%      | 4.54%      |
| 2008                      | 51.11%            | 10.47%     | 32.15%              | 1.40%              | 0.01%      | 4.86%      |
| 2009                      | 50.95%            | 10.48%     | 32.09%              | 1.40%              | 0.01%      | 5.07%      |
| 2010                      | 50.65%            | 10.47%     | 32.07%              | 1.38%              | 0.01%      | 5.42%      |
| 2011                      | 50.44%            | 10.46%     | 32.08%              | 1.38%              | 0.01%      | 5.63%      |
| 2012                      | 50.18%            | 10.47%     | 32.07%              | 1.37%              | 0.01%      | 5.90%      |
| 2013                      | 49.84%            | 10.47%     | 32.02%              | 1.36%              | 0.02%      | 6.29%      |
| 2014                      | 49.50%            | 10.45%     | 32.02%              | 1.37%              | 0.02%      | 6.64%      |
| 2015                      | 49.25%            | 10.45%     | 32.00%              | 1.37%              | 0.02%      | 6.91%      |
| Linear regression by year |                   |            |                     |                    |            |            |
| Slope                     | -2.58E-03 ↓       | 2.12E-04 ↑ | -7.04E-04 ↓         | -8.60E-05 ↓        | 5.74E-06 ↑ | 3.15E-03 ↑ |
| Intercept                 | 5.69              | -0.321     | 1.74                | 0.187              | -1.14E-02  | -6.28      |
| R <sup>2</sup>            | 0.996             | 0.556      | 0.801               | 0.917              | 0.459      | 0.997      |
| <i>p</i>                  | < 0.0001          | 0.0009     | < 0.0001            | < 0.0001           | 0.004      | < 0.0001   |

↑ : increasing trend; ↓ : decreasing trend.

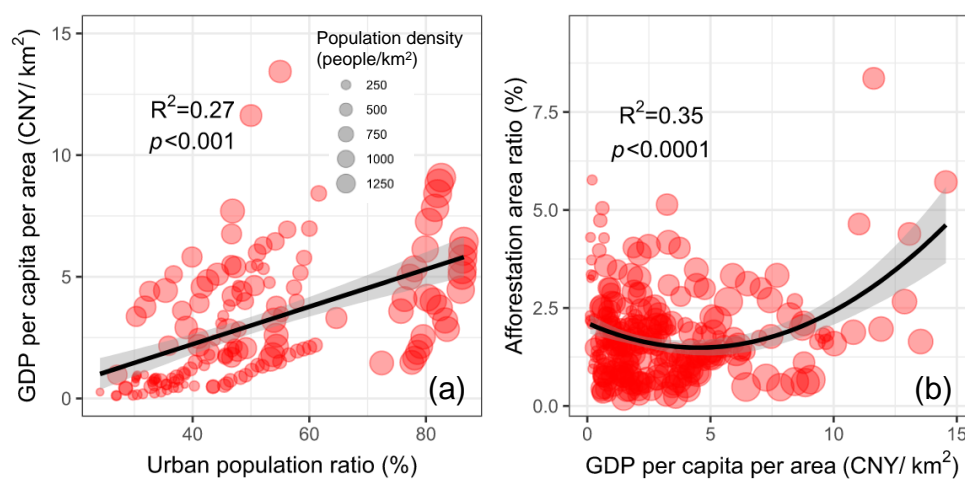

**Figure S1.** The bivariate regression between the urban population ratio and the regional gross domestic product (GDP) per capita per area ( $y = 0.077x - 0.847$ ) (a). The bivariate regression between the regional GDP and the regional afforestation area ratio ( $y = 0.029x^2 - 0.259x + 2.083$ ) in the 26 cities of the Haihe River Basin during the period 2000–2015 (b).
